# Supplementary material
Source: Research Square preprint supplement (doi:10.21203/rs.3.rs-9962502/v1)
Supplement: Supplementary file 1 [file ca30206ad8550067c8df47b8.docx]

**Online Appendix – I: Construct, Items and Source**

The author's own creation

| No | **Construct** | **Items** | **Source** |
| --- | --- | --- | --- |
| 1 | Cultural Tourism | Cultural variation motivates my travelling purpose. | (Asadi, 2011) |
| 2 |  | A positive culture increases my travelling intention. |  |
| 3 |  | Dynest culture fascinates my travelling. |  |
| 1 | Digital Tourism | Digital tourism gave me access to the right tourism plan. | (Ghasemnejhad et al., 2021) |
| 2 |  | Digital tourism assists me in finding the right tourism. |  |
| 3 |  | Digital tourism enhances the visibility of the destination. |  |
| 4 |  | Digital tourism changes the perception of tourism. |  |
| 1 | Economic Benefits | I think ageing tourism engages all populations in the economic ecosystem. | (Hanney et al., 1999) |
| 2 |  | I think ageing tourism increases economic benefits. |  |
| 3 |  | Ageing tourism engages all older people in the economic ecosystem. |  |
| 4 |  | I am confident that ageing tourism increases economic benefits.. |  |
| 1 | Eco-Tourism | Eco-tourism variation motivates my travelling purpose. | (Arachchi et al., 2015) |
| 2 |  | Eco-Tourism increases my travelling intention. |  |
| 3 |  | Eco-tourism fascinates my travelling. |  |
| 4 |  | Eco-tourism changes the perception of tourism. |  |
| 5 |  | Eco-Tourism gives me ideas about ecology and a healthy life. |  |
| 1 | Healthy Ageing | I think older tourism improves my livelihood. | (Ng et al., 2023) |
| 2 |  | I think older tourism expands my lifestyle. |  |
| 3 |  | I think older tourism improves a person's overall health condition. |  |
| 4 |  | Having an older tourism will give me better health. |  |
| 5 |  | I reflect older tourism improves my living. |  |
| 6 |  | I contemplate how older tourism will progress my healthy life. |  |
| 1 | Health Tourism | Healthy tourism is the purpose of sustainable tourism. | (Asadi, 2011) |
| 2 |  | Healthy tourism increases sustainable tourism. |  |
| 3 |  | Healthy tourism influences sustainable tourism. |  |
| 4 |  | Healthy tourism can change the tourism paradigm. |  |
| 1 | Quality of Life | Ageing tourism increases my quality of life. | (Evans et al., 1985) |
| 2 |  | Quality of life depends on tourism. |  |
| 3 |  | Travel and tourism are significant elements that change the quality of life. |  |
| 4 |  | Tourism is necessary for my sound and quality of life. |  |
| 1 | Senior-friendly services | As an older tourist, I prefer not to discriminate me. | (Zhang & Pan, 2021) |
| 2 |  | I prefer not to discriminate my age for tourist service. |  |
| 3 |  | I hope to have good service, which will increase my satisfaction. |  |
| 4 |  | Ageing tourists prefer friendly service. |  |

z
